# Supplementary material for: Comprehensive Gene Mutation Profiling of Circulating Tumor DNA in Ovarian Cancer: Its Pathological and Prognostic Impact
Source: PubMed Central journal article supplement (PMC7697720; doi:10.3390/cancers12113382), 2020-11-16
Supplement: cancers-12-03382-s001.pdf [file cancers-12-03382-s001.pdf]

# Comprehensive Gene Mutation Profiling of Circulating Tumor DNA in Ovarian Cancer: Its Pathological and Prognostic Impact

Tomoko Noguchi, Naoyuki Iwahashi, Kazuko Sakai, Kaho Matsuda, Hitomi Matsukawa, Saori Toujima, Kazuto Nishio, Kazuhiko Ino

Table S1. List of *TP53* mutations detected in ctDNA and tissue-DNA.

| patient No. | ctDNA        | tissue-DNA   |
|-------------|--------------|--------------|
| HGSC-01     | p.R248W      | p.R248W      |
| HGSC-02     | not detected | not detected |
| HGSC-03     | p.V216E      | p.V216E      |
| HGSC-04     | p.R213*      | p.R213*      |
| HGSC-05     | not detected | not detected |
| HGSC-06     | p.E286K      | p.E286K      |
| HGSC-07     | p.R175H      | p.R175H      |
| HGSC-08     | p.Y205C      | p.Y205C      |
| HGSC-09     | p.R196*      | p.R196*      |
| HGSC-10     | not detected | not detected |
| HGSC-11     | p.Q136E      | p.Q136E      |
| HGSC-12     | p.H179Y      | p.H179Y      |
| HGSC-13     | not detected | not detected |
| HGSC-14     | p.R248W      | p.R248W      |
| HGSC-15     | c.673-2A>G   | c.673-2A>G   |
| HGSC-16     | not detected | p.K132R      |
| HGSC-17     | not detected | p.E349*      |
| HGSC-18     | p.C238Y      | p.C238Y      |
| HGSC-19     | not detected | not detected |
| HGSC-20     | not detected | p.E171G      |
| HGSC-21     | p.R249W      | p.R249W      |
| HGSC-22     | p.R248W      | not detected |

The marker indicated the synchronous *TP53* mutations both in tissue-DNA and ctDNA.
